# Supplementary material for: Diagnostic imaging for chronic plantar heel pain: a systematic review and meta-analysis
Source: PubMed Central journal article supplement (PMC2784446; doi:10.1186/1757-1146-2-32), 2009-11-13
Supplement: 1757-1146-2-32-S1.pdf [file 1757-1146-2-32-S1.pdf]

# Diagnostic imaging for chronic plantar heel pain: a systematic review and meta-analysis

Andrew M. McMillan, Karl B. Landorf, Joanna T. Barrett, Hylton B. Menz, Adam R. Bird

## Additional Data File 1. Description of search strategy.

Database-specific subject terms and truncated keywords were initially sorted into two distinct concepts: (a) chronic plantar heel pain and (b) diagnostic imaging. Within each concept, subject terms were searched individually while keywords were combined with the term 'OR' into a single search. Subject terms and keywords within each concept were then combined with the term 'OR' to remove duplicates. Following this, the final search results for the two concepts were combined together with the term 'AND' to form the total yield. This technique was applied to Medline (Supplementary Table 1), Embase and CINAHL. SportDiscus and the Cochrane Library were searched by use of keywords only, as subject term functions were not available in these databases. Targeted searching of relevant journals also occurred following bibliographic review of retrieved articles.

## Supplementary Table 1. Medline search strategy

|          |    |              |                                                                                                                                                                                                                                      |
|----------|----|--------------|--------------------------------------------------------------------------------------------------------------------------------------------------------------------------------------------------------------------------------------|
| <b>a</b> | 1  | Subject Term | exp. Fasciitis, Plantar                                                                                                                                                                                                              |
|          | 2  | Subject Term | exp. Heel Spur                                                                                                                                                                                                                       |
|          | 3  | Keywords     | Plantar Fasci* [or] Calcaneal Enthes* [or] Calcaneal Periostitis [or] Calcaneodynia [or] Epin Calcanei [or] Heel Enthes* [or] Heel Pain [or] Heel Syndrome [or] Painful Heel* [or] Subcalcaneal [or] Sub-calcaneal [or] Spur         |
| <b>b</b> | 4  | Subject Term | exp. Pathology                                                                                                                                                                                                                       |
|          | 5  | Subject Term | exp. Diagnostic Imaging                                                                                                                                                                                                              |
|          | 6  | Subject Term | exp. Magnetic Resonance Imaging                                                                                                                                                                                                      |
|          | 7  | Subject Term | exp. Ultrasonography                                                                                                                                                                                                                 |
|          | 8  | Subject Term | exp. Radiography                                                                                                                                                                                                                     |
|          | 9  | Subject Term | exp. Tomography                                                                                                                                                                                                                      |
|          | 10 | Subject Term | exp. Radionuclide Imaging                                                                                                                                                                                                            |
|          | 11 | Keywords     | Patholog* [or] Image* [or] Imaging [or] Scan* [or] MR* [or] Ultrasonograph* [or] Sonograph* [or] Echograph* [or] Ultrasound [or] US [or] Doppler [or] Radio* [or] X-Ray* [or] X Ray* [or] XRay* [or] Tomograph* [or] CT [or] Scinti* |
| <b>c</b> | 12 | Combine      | 1 [or] 2 [or] 3                                                                                                                                                                                                                      |
|          | 13 | Combine      | 4 [or] 5 [or] 6 [or] 7 [or] 8 [or] 9 [or] 10 [or] 11                                                                                                                                                                                 |
|          | 14 | Combine      | 12 [and] 13                                                                                                                                                                                                                          |

**(a) Search terms for chronic plantar heel pain (b) Search terms for diagnostic imaging (c) Combination of search terms.**
