# Supplementary material for: Diagnostic imaging for chronic plantar heel pain: a systematic review and meta-analysis
Source: PubMed Central journal article supplement (PMC2784446; doi:10.1186/1757-1146-2-32), 2009-11-13
Supplement: 1757-1146-2-32-S3.pdf [file 1757-1146-2-32-S3.pdf]

# Diagnostic imaging for chronic plantar heel pain: a systematic review and meta-analysis

Andrew M. McMillan, Karl B. Landorf, Joanna T. Barrett, Hylton B. Menz, Adam R. Bird

---

## Additional Data File 3. Search results by database.

|                                  |      |
|----------------------------------|------|
| <b>Medline</b>                   | 422  |
| <b>EMBASE</b>                    | 431  |
| <b>CINAHL</b>                    | 196  |
| <b>Sport Discus</b>              | 134  |
| <b>Cochrane Library</b>          | 1    |
| <b>Total</b>                     | 1184 |
| <b>Total without duplication</b> | 764  |
