# Supplementary material for: Diagnostic imaging for chronic plantar heel pain: a systematic review and meta-analysis
Source: PubMed Central journal article supplement (PMC2784446; doi:10.1186/1757-1146-2-32), 2009-11-13
Supplement: 1757-1146-2-32-S6.pdf [file 1757-1146-2-32-S6.pdf]

# Diagnostic imaging for chronic plantar heel pain: a systematic review and meta-analysis

Andrew M. McMillan, Karl B. Landorf, Joanna T. Barrett, Hylton B. Menz, Adam R. Bird

## Additional Data File 6. Quality Index Scores

|                        | Question |   |   |   |   |     |     |    |    |    |    |    |    |    |    |  |           |
|------------------------|----------|---|---|---|---|-----|-----|----|----|----|----|----|----|----|----|--|-----------|
|                        | 1        | 2 | 3 | 5 | 6 | 7   | 10  | 12 | 15 | 16 | 18 | 20 | 21 | 22 | 25 |  |           |
|                        |          |   |   |   |   |     |     |    |    |    |    |    |    |    |    |  | %         |
| <b>Akfirat [1]</b>     | 1        | 0 | 1 | 1 | 1 | 1   | 0   | 0  | 0  | 1  | 1  | 0  | 0  | 0  | 1  |  | <b>53</b> |
| <b>Berkowitz [2]</b>   | 1        | 1 | 0 | 0 | 1 | 1   | 0.5 | 0  | 0  | 1  | 0  | 1  | 0  | 0  | 0  |  | <b>43</b> |
| <b>Bygrave [3]</b>     | 1        | 1 | 0 | 1 | 1 | 1   | 0.5 | 0  | 0  | 1  | 1  | 1  | 0  | 0  | 0  |  | <b>57</b> |
| <b>Cardinal [4]</b>    | 1        | 1 | 0 | 0 | 1 | 1   | 0.5 | 0  | 0  | 1  | 0  | 0  | 0  | 0  | 0  |  | <b>37</b> |
| <b>Cetin [5]</b>       | 1        | 1 | 0 | 1 | 1 | n/a | 0   | 0  | 0  | 1  | 0  | 0  | 1  | 0  | 1  |  | <b>50</b> |
| <b>Genc [6]</b>        | 1        | 1 | 0 | 1 | 1 | 1   | 0.5 | 0  | 1  | 1  | 1  | 1  | 1  | 0  | 1  |  | <b>77</b> |
| <b>Gibbon [7]</b>      | 1        | 1 | 0 | 0 | 1 | 0   | 0.5 | 0  | 0  | 1  | 1  | 1  | 0  | 0  | 0  |  | <b>43</b> |
| <b>Hall [8]</b>        | 1        | 0 | 1 | 0 | 0 | n/a | 0   | 0  | 0  | 1  | 0  | 0  | 1  | 0  | 0  |  | <b>29</b> |
| <b>Kamel [9]</b>       | 1        | 1 | 0 | 0 | 1 | 1   | 0.5 | 0  | 0  | 1  | 0  | 1  | 0  | 0  | 0  |  | <b>43</b> |
| <b>Karabay [10]</b>    | 0        | 1 | 0 | 0 | 1 | 1   | 0   | 0  | 0  | 1  | 0  | 1  | 0  | 0  | 1  |  | <b>40</b> |
| <b>O'Duffy [11]</b>    | 1        | 1 | 1 | 0 | 1 | n/a | 0   | 0  | 0  | 1  | 0  | 0  | 1  | 0  | 1  |  | <b>50</b> |
| <b>Osborne [12]</b>    | 1        | 1 | 1 | 0 | 1 | n/a | 0.5 | 0  | 1  | 1  | 1  | 1  | 0  | 0  | 1  |  | <b>68</b> |
| <b>Ozdemir [13]</b>    | 1        | 1 | 0 | 1 | 1 | 1   | 0   | 1  | 1  | 1  | 1  | 1  | 0  | 0  | 0  |  | <b>67</b> |
| <b>Prichasuk [14]</b>  | 1        | 1 | 1 | 0 | 1 | n/a | 0.5 | 0  | 0  | 1  | 1  | 1  | 0  | 1  | 0  |  | <b>61</b> |
| <b>Sabir [15]</b>      | 1        | 1 | 0 | 1 | 1 | 1   | 0.5 | 0  | 1  | 1  | 1  | 1  | 0  | 1  | 0  |  | <b>70</b> |
| <b>Tsai [16]</b>       | 1        | 1 | 0 | 1 | 1 | 1   | 0.5 | 1  | 1  | 1  | 1  | 1  | 0  | 0  | 1  |  | <b>77</b> |
| <b>Turgut [17]</b>     | 1        | 1 | 1 | 0 | 1 | 1   | 0   | 0  | 1  | 1  | 1  | 1  | 1  | 1  | 1  |  | <b>80</b> |
| <b>Vohra [18]</b>      | 1        | 1 | 1 | 0 | 1 | 0   | 0.5 | 0  | 0  | 1  | 1  | 0  | 0  | 0  | 1  |  | <b>50</b> |
| <b>Wainwright [19]</b> | 1        | 1 | 1 | 0 | 1 | n/a | 0.5 | 0  | 0  | 1  | 1  | 1  | 1  | 0  | 0  |  | <b>61</b> |
| <b>Wall [20]</b>       | 1        | 1 | 0 | 1 | 1 | 1   | 1   | 0  | 1  | 1  | 1  | 1  | 0  | 0  | 1  |  | <b>73</b> |
| <b>Walther [21]</b>    | 1        | 1 | 0 | 0 | 1 | 1   | 0   | 0  | 0  | 1  | 1  | 0  | 0  | 0  | 1  |  | <b>47</b> |
| <b>Wearing [22]</b>    | 1        | 1 | 0 | 1 | 1 | 1   | 0   | 0  | 0  | 1  | 0  | 1  | 0  | 0  | 1  |  | <b>53</b> |
| <b>Williams [23]</b>   | 0        | 0 | 1 | 0 | 1 | n/a | 0   | 0  | 1  | 1  | 0  | 0  | 1  | 0  | 0  |  | <b>36</b> |

## Additional Data File 6. References

1. Akfirat M, Sen C, Gunes T: **Ultrasonographic appearance of the plantar fasciitis.** *Clin Imaging* 2003, **27**(5):353-357.
2. Berkowitz JF, Kier R, Rudicel S: **Plantar fasciitis: M.R imaging.** *Radiology* 1991, **179**(3):665-667.
3. Bygrave CJ, Betts RP, Saxelby J: **Diagnosing plantar fasciitis with ultrasound using Planscan.** *Foot* 1998, **8**(3):141-146.
4. Cardinal E, Chhem RK, Beauregard CG, Aubin B, Pelletier M: **Plantar fasciitis: sonographic evaluation.** *Radiology* 1996, **201**(1):257-259.
5. Cetin A, Sivri A, Dincer F, Kiratli P, Ceylan E: **Evaluation of chronic plantar fasciitis by scintigraphy and relation to clinical parameters.** *J Musculoskeletal Pain* 2001, **9**(4):55-61.
6. Genc H, Saracoglu M, Nacir B, Erdem HR, Kacar M: **Long-term ultrasonographic follow-up of plantar fasciitis patients treated with steroid injection.** *Joint Bone Spine* 2005, **72**(1):61-65.
7. Gibbon WW, Long G: **Ultrasound of the plantar aponeurosis (fascia).** *Skeletal Radiol* 1999, **28**(1):21-26.
8. Hall RL, Erickson SJ, Shereff MJ, Johnson JE, Kneeland JB: **Magnetic resonance imaging in the evaluation of heel pain.** *Orthopedics* 1996, **19**(3):225-229.
9. Kamel M, Kotob H: **High frequency ultrasonographic findings in plantar fasciitis and assessment of local steroid injection.** *J Rheumatol* 2000, **27**(9):2139-2141.
10. Karabay N, Toros T, Hurel C: **Ultrasonographic evaluation in plantar fasciitis.** *J Foot Ankle Surg* 2007, **46**(6):442-446.
11. O'Duffy EK, Clunie GP, Gacinovic S, Edwards JC, Bomanji JB, Ell PJ: **Foot pain: specific indications for scintigraphy.** *Br J Rheumatol* 1998, **37**(4):442-447.
12. Osborne HR, Breidahl WH, Allison GT: **Critical differences in lateral X-rays with and without a diagnosis of plantar fasciitis.** *J Sci Med Sport* 2006, **9**(3):231-237.
13. Ozdemir H, Yilmaz E, Murat A, Karakurt L, Poyraz AK, Ogur E: **Sonographic evaluation of plantar fasciitis and relation to body mass index.** *Eur J Radiol* 2005, **54**(3):443-447.
14. Prichasuk S, Subhadrabandhu T: **The relationship of pes planus and calcaneal spur to plantar heel pain.** *Clin Orthop* 1994(306):192-196.
15. Sabir N, Demirlenk S, Yagci B, Karabulut N, Cubukcu S: **Clinical utility of sonography in diagnosing plantar fasciitis.** *J Ultrasound Med* 2005, **24**(8):1041-1048.
16. Tsai WC, Chiu MF, Wang CL, Tang FT, Wong MK: **Ultrasound evaluation of plantar fasciitis.** *Scand J Rheumatol* 2000, **29**(4):255-259.
17. Turgut A, Gokturk E, Kose N, Seber S, Hazer B, Gunal I: **The relationship of heel pad elasticity and plantar heel pain.** *Clin Orthop* 1999(360):191-196.
18. Vohra PK, Kincaid BR, Japour CJ, Sobel E: **Ultrasonographic evaluation of plantar fascia bands. A retrospective study of 211 symptomatic feet.** *J Am Podiatr Med Assoc* 2002, **92**(8):444-449.
19. Wainwright AM, Kelly AJ, Winson IG: **Calcaneal spurs and plantar fasciitis.** *Foot* 1995, **5**(3):123-126.

20. Wall JR, Harkness MA, Crawford A: **Ultrasound diagnosis of plantar fasciitis.** *Foot Ankle* 1993, **14**(8):465-470.
21. Walther M, Radke S, Kirschner S, Ettl V, Gohlke F: **Power Doppler findings in plantar fasciitis.** *Ultrasound Med Biol* 2004, **30**(4):435-440.
22. Wearing SC, Smeathers JE, Sullivan PM, Yates B, Urry SR, Dubois P: **Plantar fasciitis: are pain and fascial thickness associated with arch shape and loading?** *Phys Ther* 2007, **87**(8):1002-1008.
23. Williams PL, Smibert JG, Cox R, Mitchell R, Klenerman L: **Imaging study of the painful heel syndrome.** *Foot Ankle* 1987, **7**(6):345-349.
