# Supplementary material for: Diagnostic imaging for chronic plantar heel pain: a systematic review and meta-analysis
Source: J Foot Ankle Res. 2009 Nov 13;2:32. doi: 10.1186/1757-1146-2-32 (PMC2784446; doi:10.1186/1757-1146-2-32)
Supplement: Additional file 5 — Exclusion grounds for articles rejected after full-text assessment. A table showing the exclusion grounds for articles excluded from the review after full-text assessment. [file 1757-1146-2-32-S5.pdf]

# Diagnostic imaging for chronic plantar heel pain: a systematic review and meta-analysis

Andrew M. McMillan, Karl B. Landorf, Joanna T. Barrett, Hylton B. Menz, Adam R. Bird

## Additional Data File 5. Exclusion grounds for articles rejected after full-text assessment

|    | Principal Author | Year | Grounds for Exclusion                                                                        |
|----|------------------|------|----------------------------------------------------------------------------------------------|
| 1  | Breunung         | 2008 | Single case report                                                                           |
| 2  | Buchbinder       | 2002 | No imaging comparison to independent control group                                           |
| 3  | Chigwanda        | 1997 | No imaging comparison to independent control group                                           |
| 4  | Chundru          | 2008 | Comparison of patients with and without muscular atrophy                                     |
| 5  | Cosentino        | 2001 | No imaging comparison to independent control group                                           |
| 6  | Cosentino        | 2004 | No imaging comparison to independent control group                                           |
| 7  | Falsetti         | 2003 | Disease specific cohort                                                                      |
| 8  | Frater           | 2006 | No imaging comparison to independent control group                                           |
| 9  | Grasel           | 1999 | No imaging comparison to independent control group                                           |
| 10 | Groshar          | 2000 | Comparison to asymptomatic foot only                                                         |
| 11 | Hammer           | 2005 | Comparison to asymptomatic foot only                                                         |
| 12 | Heim             | 2000 | Case reports                                                                                 |
| 13 | Howells          | 1994 | Letter and author reply                                                                      |
| 14 | Intenzo          | 1991 | No imaging comparison to independent control group                                           |
| 15 | Kamel            | 2003 | Disease specific cohort: seronegative arthropathy                                            |
| 16 | Kane             | 1998 | Comparison to asymptomatic foot only                                                         |
| 17 | Kane             | 2001 | Comparison to asymptomatic foot only                                                         |
| 18 | Kell             | 1994 | Case reports                                                                                 |
| 19 | Kier             | 1991 | No comparative research, graphical descriptions only                                         |
| 20 | Koulouris        | 2005 | No comparative research                                                                      |
| 21 | Levy             | 2006 | No imaging comparison to independent control group                                           |
| 22 | Liang            | 2007 | No imaging comparison to independent control group                                           |
| 23 | Maier            | 2000 | No imaging comparison to independent control group                                           |
| 24 | McGonagle        | 2002 | No imaging comparison to independent control group                                           |
| 25 | Ozdemir          | 2002 | No imaging comparison to independent control group                                           |
| 26 | Rapp             | 2006 | No imaging comparison to independent control group, not published in a peer-reviewed journal |
| 27 | Reinherz         | 1989 | No research findings presented                                                               |
| 28 | Roger            | 1997 | Pictorial review only                                                                        |
| 29 | Sewell           | 1980 | No imaging comparison to independent control group                                           |
| 30 | Sorrentino       | 2008 | No imaging comparison to independent control group                                           |
| 31 | Tanz             | 1963 | Various causes of plantar heel pain, including trauma                                        |
| 32 | Theodorou        | 2000 | No imaging comparison to independent control group                                           |
| 33 | Theodorou        | 2002 | No imaging comparison to independent control group                                           |
| 34 | Tsai             | 2000 | No imaging comparison to independent control group                                           |
| 35 | Tudor            | 1997 | No imaging comparison to independent control group                                           |
| 36 | Uzel             | 2006 | No imaging comparison to independent control group                                           |
| 37 | Wearing          | 2004 | Unable to verify if imaging results had been published elsewhere                             |
